# Supplementary material
Source: PubMed Central journal article supplement (PMC10241269)
Supplement: EIJ-D-21-01048_Garot_SD.pdf [file EIJ-D-21-01048_Garot_SD.pdf]

## Supplementary data

**Supplementary Table 1. Comparison of definitions between the ARC-HBR criteria and the present study.**

| ARC-HBR criteria                                                                                                                         | Present study                                                           | Category | Comments      |
|------------------------------------------------------------------------------------------------------------------------------------------|-------------------------------------------------------------------------|----------|---------------|
| Age $\geq 75$                                                                                                                            | Age $\geq 75$                                                           | Minor    | Identical     |
| Anticipated use of long-term oral anticoagulation*                                                                                       | Long-term OAC                                                           | Major    | Identical     |
| Severe or end-stage CKD (eGFR $< 30$ mL/min)                                                                                             | Clearance creatinine by original MDRD, same cut-off                     | Major    | Identical     |
| Moderate CKD (eGFR 30–59 mL/min)                                                                                                         | Clearance creatinine by original MDRD, same cut-off                     | Minor    | Identical     |
| Haemoglobin $< 11$ g/dL                                                                                                                  | Haemoglobin $< 11$ g/dL                                                 | Major    | Identical     |
| Haemoglobin 11–12.9 g/dL for men and 11–11.9 g/dL for women                                                                              | Haemoglobin 11–12.9 g/dL for men and 11–11.9 g/dL for women             | Minor    | Identical     |
| Spontaneous bleeding requiring hospitalisation or transfusion in the past 6 months or at any time, if recurrent                          |                                                                         | Major    | Not available |
| Spontaneous non-intracranial bleeding requiring hospitalisation or transfusion within the past 12 months not meeting the major criterion |                                                                         | Minor    | Not available |
| Moderate or severe baseline thrombocytopaenia (platelet count $< 100 \times 10^9/L$ )                                                    | Severe coagulation condition is a criterion for exclusion               | Major    | Not available |
| Chronic bleeding diathesis                                                                                                               | Active bleeding is a criterion for exclusion                            | Major    | Not available |
| Liver cirrhosis with portal hypertension                                                                                                 | Severe coagulation condition is a criterion for exclusion               | Major    | Not available |
| Long-term use of oral NSAIDs or steroids NSAIDS at discharge                                                                             | List of medications at the time of procedure and at discharge available | Minor    | identical     |
| Active malignancy (excluding non-melanoma skin cancer) within the past 12 months                                                         | Active cancer in the past 12 months                                     | Major    | identical     |
| Previous spontaneous ICH (at any time)                                                                                                   | Previous haemorrhagic stroke                                            | Major    | modified      |
| Presence of a bAVM                                                                                                                       |                                                                         | Major    | Not available |

|                                                                  |                                                |       |               |
|------------------------------------------------------------------|------------------------------------------------|-------|---------------|
|                                                                  |                                                |       |               |
| Moderate or severe ischaemic stroke within the past 6 mo         | Previous stroke or TIA (no indication of date) | Major | Not available |
| Non-deferrable major surgery on DAPT                             |                                                | Major | Not available |
| Recent major surgery or major trauma within 30 d before PCI      |                                                | Major | Not available |
| Any ischaemic stroke at any time not meeting the major criterion | Previous stroke or TIA (no indication of date) | Minor | Modified      |

bAVM: brain arteriovenous malformation; CKD: chronic kidney disease; DAPT: dual antiplatelet therapy; eGFR: estimated glomerular filtration rate; HBR: high bleeding risk; ICH: intracranial haemorrhage; NSAID: non-steroidal anti-inflammatory drug; PCI: percutaneous coronary intervention
